# Supplementary material
Source: PubMed Central journal article supplement (PMC6112577)
Supplement: dey248suppl_table1.pdf [file dey248suppl_table1.pdf]

**Supplemental Table S1 Summary measure of cumulative physical and sexual abuse.**

|                             |                                | Sexual abuse <sup>b</sup>                           |                                                     |                                                     |                                              |
|-----------------------------|--------------------------------|-----------------------------------------------------|-----------------------------------------------------|-----------------------------------------------------|----------------------------------------------|
|                             |                                | No abuse                                            | Touched only                                        | Forced sex as a child or adolescent                 | Forced sex as a child and adolescent         |
| Physical abuse <sup>a</sup> | No abuse                       | No exposure to violence (Level 1)                   | Mild/moderate single type (Level 2)                 | Mild-multiple types or severe-single type (Level 3) | Moderate-chronic or multiple types (Level 4) |
|                             | Mild to Moderate               | Mild/moderate single type (Level 2)                 | Mild-multiple types or severe-single type (Level 3) | Moderate-chronic or multiple types (Level 4)        | Severe-chronic or multiple types (Level 5)   |
|                             | Severe as child or adolescent  | Mild-multiple types or severe-single type (Level 3) | Moderate-chronic or multiple types (Level 4)        | Severe-chronic or multiple types (Level 5)          | Severe chronic and multiple types (Level 6)  |
|                             | Severe as child and adolescent | Moderate-chronic or multiple types (Level 4)        | Severe-chronic or multiple types (Level 5)          | Severe chronic and multiple types (Level 6)         | Severe chronic and multiple types (Level 6)  |

<sup>a</sup>Physical abuse categories: Mild to moderate (pushed, grabbed or shoved at any frequency; kicked, bitten or punch once; hit with something at any frequency; physically attacked once), Severe as child or adolescent (kicked, bitten, or punched more than once, physically attacked more than once, choked or burned ever, as a child or adolescent), Severe as child and adolescent (kicked, bitten or punched more than once, physically attacked more than once, choked or burned ever, as a child and adolescent)

<sup>b</sup>Sexual abuse categories: Touched only (touched in a sexual way as a child and/or adolescent), forced sex as a child or adolescent (forced into any sexual activity by an adult or older child as a child or adolescent), forced sex as a child and adolescent (forced into any sexual activity by an adult or older child as a child and adolescent)
