# Supplementary material
Source: PubMed Central journal article supplement (PMC6112577)
Supplement: dey248suppl_table2.pdf [file dey248suppl_table2.pdf]

**Supplemental Table SII** Baseline characteristics among those who did and did not complete the violence victimization questionnaire in 2001, Nurses' Health Study II participants.

| Characteristic                   | Violence victimization questionnaire completion |                        |
|----------------------------------|-------------------------------------------------|------------------------|
|                                  | Did not complete <sup>a</sup> (n = 42 416)      | Completed (n = 60 595) |
|                                  | Mean (SD)                                       | Mean (SD)              |
| BMI                              | 24.3 (5.2)                                      | 23.8 (4.9)             |
| Parity                           | 1.46 (1.21)                                     | 1.41 (1.20)            |
| Physical activity (METs/week)    | 25.6 (38.8)                                     | 24.5 (35.5)            |
| Alcohol intake (g/day)           | 3.0 (5.9)                                       | 3.2 (6.1)              |
|                                  | %                                               | %                      |
| Race                             |                                                 |                        |
| White                            | 89                                              | 95                     |
| Cigarette smoking                |                                                 |                        |
| Never                            | 64                                              | 67                     |
| Past                             | 21                                              | 21                     |
| Current                          | 15                                              | 12                     |
| Age at menarche                  |                                                 |                        |
| <12                              | 25                                              | 24                     |
| 12                               | 30                                              | 30                     |
| 13                               | 27                                              | 28                     |
| >13                              | 18                                              | 18                     |
| Menstrual cycle length at age 18 |                                                 |                        |
| <26 days                         | 13                                              | 11                     |
| 26–31 days                       | 66                                              | 66                     |
| 32–50 days                       | 16                                              | 18                     |
| >51 days                         | 5                                               | 5                      |
| Oral contraceptive use           |                                                 |                        |
| Ever                             | 82                                              | 83                     |
| Never                            | 18                                              | 17                     |
| Infertility                      |                                                 |                        |
| Yes                              | 16                                              | 16                     |
| No                               | 84                                              | 84                     |

<sup>a</sup>The violence victimization questionnaire was not sent to participants who had previously requested short form surveys or who required more than four mailings before responding to the 1999 questionnaire. Due to potential safety concerns regarding mailing the questions, the IRB allowed only a single reminder postcard for those who were sent the questionnaire but did not immediately respond. The 'did not complete' group includes those who were not sent the questionnaire and those who were sent the questionnaire but did not return it.
